# Supplementary material for: Inner tegument protein pUL37 of herpes simplex virus type 1 is involved in directing capsids to the trans-Golgi network for envelopment
Source: PubMed Central journal article supplement (PMC3066548; doi:10.1099/vir.0.022053-0), 2010-09
Supplement: supp_91_9_2145__2.pdf [file supp_91_9_2145__2.pdf]

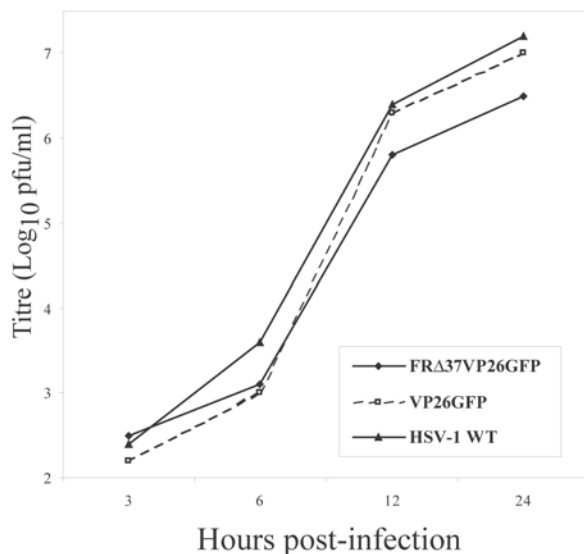

**Supplementary Fig. S1.** Single-step growth-curve analysis of vFR $\Delta$ 37-VP26GFP. Replicate 60 mm dishes of cells were infected with 5 p.f.u. of WT HSV-1, vFR $\Delta$ 37-VP26GFP or vVP26GFP per cell. After 1 h infection, the cells were washed at low pH to remove residual input infectivity, overlaid with 2 ml DMEM and incubation was continued at 37 °C. At 3, 6, 12 and 24 h after infection, cells were harvested by scraping into the growth medium and the progeny virus was titrated. WT HSV-1 and vVP26GFP were grown on RS cells, whereas vFR $\Delta$ 37-VP26GFP was grown on 80C02 complementing cells.

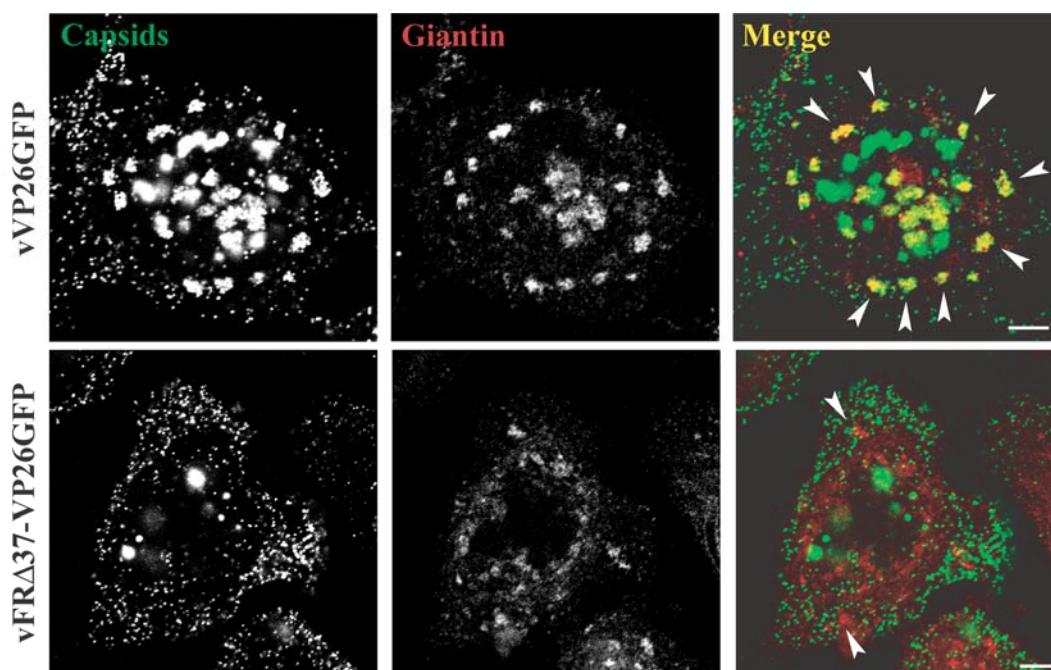

**Supplementary Fig. S2.** Association of capsids with the Golgi in cells infected with vVP26GFP or vFR $\Delta$ 37-VP26GFP as assessed by giantin labelling. HeLa cells were infected with 5 p.f.u. of the indicated virus per cell. After 15 h infection, they were fixed and the Golgi was labelled using the monoclonal anti-giantin antibody and a GAM<sub>568</sub> antibody (red). Arrowheads indicate Golgi-derived vesicles. Bars, 5  $\mu$ m.

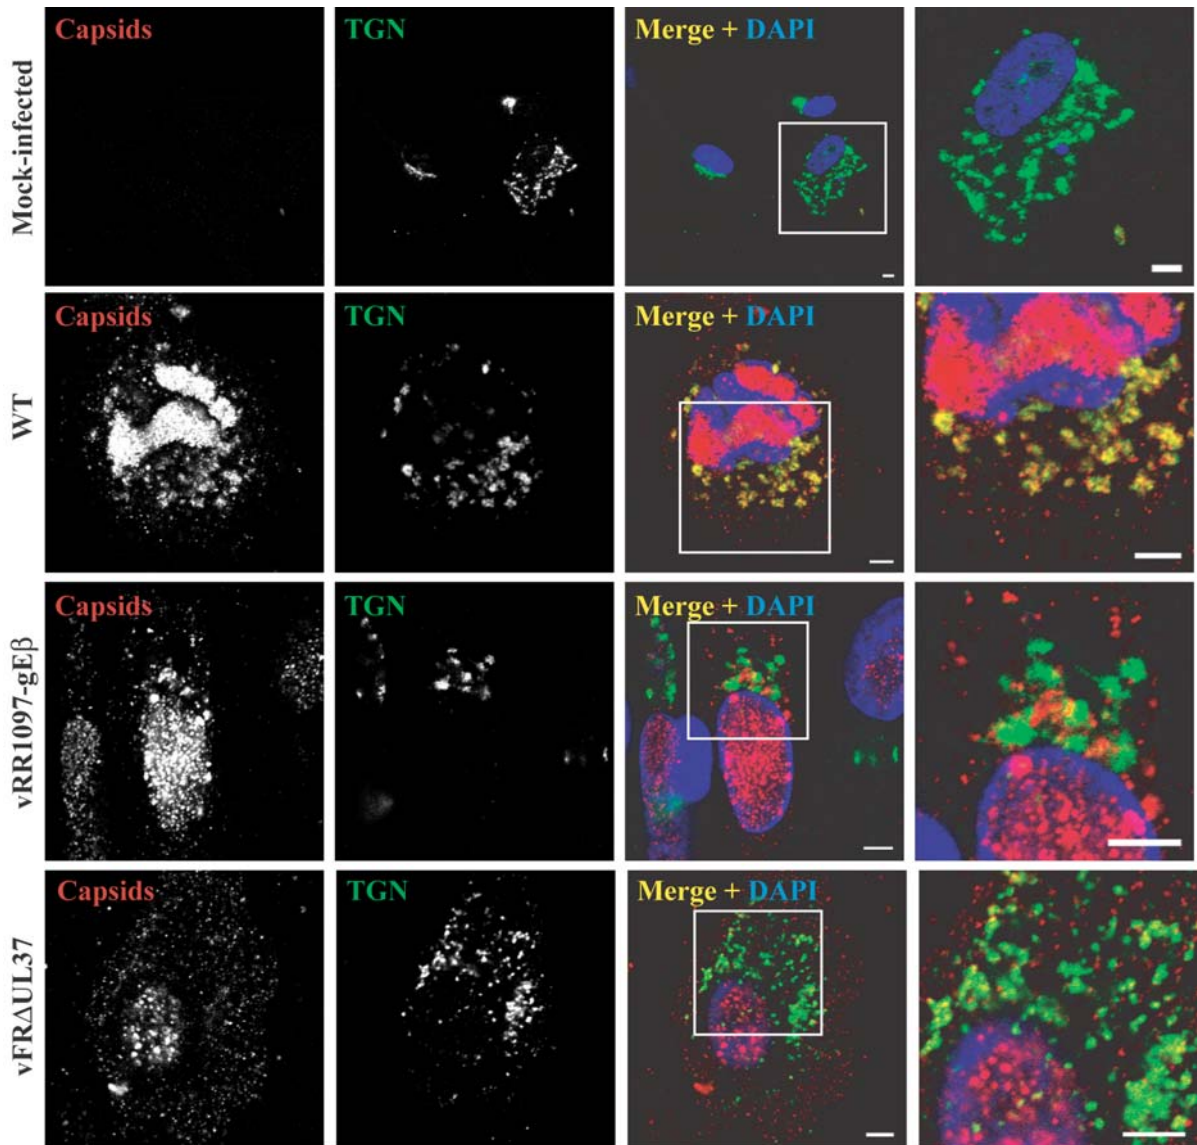

**Supplementary Fig. S3.** Association of untagged capsids with the TGN. HeLa cells were mock-infected or infected with 5 p.f.u of WT HSV-1, vRR1097-gE $\beta$  or vFR $\Delta$ UL37. per cell. At 15 h post-infection, they were fixed and stained with the mouse monoclonal DM165 anti-VP5 antibody and GAM<sub>568</sub> to label capsids (red) and anti-TGN46 antibody and GAR<sub>488</sub> antibody (green). Bar, 5  $\mu$ m.
